# Supplementary material
Source: PubMed Central journal article supplement (PMC9720868)
Supplement: sj-pdf-1-sel-10.1177_17585732211032523.pdf [file sj-pdf-1-sel-10.1177_17585732211032523.pdf]

## Appendix 1 PICO framework

|                  |                                                                                                                                                                                                                                                                                                                |
|------------------|----------------------------------------------------------------------------------------------------------------------------------------------------------------------------------------------------------------------------------------------------------------------------------------------------------------|
| Population (P)   | Patients over 16 years old undergoing shoulder surgery [OR] healthy volunteers over 16 years old participating in studies related to evaluation of various pre-surgical shoulder surgery skin preparation methods (inclusive of pre-surgical home treatments and surgical skin preparations) around the world. |
| Intervention (I) | Evaluated skin preparation methods: pre-surgical home treatments used before admission, [AND/OR] surgical skin preparation used prior to shoulder surgery                                                                                                                                                      |
| Comparison (C)   | Recommended skin preparation methods as per NICE, CDC and WHO: pre-surgical home treatment before admission, [AND/OR] surgical skin preparation used prior to shoulder surgery                                                                                                                                 |
| Outcome (O)*     | Reduction [OR] eradication of <i>C. acnes</i>                                                                                                                                                                                                                                                                  |
| Studies (S)      | Randomised Control Trials (RCT), Case Control studies, Cohort studies, Case series                                                                                                                                                                                                                             |

\*It is worth noting that for the outcome in the PICO approach, majority of studies report as Yes/No (qualitative result) to assess the success of a decolonisation method, although not so common, some also reported the reduction in *C. acnes* quantitatively as bacterial counts in CFU/mL.
