# Supplementary material
Source: PubMed Central journal article supplement (PMC9720868)
Supplement: sj-pdf-2-sel-10.1177_17585732211032523.pdf [file sj-pdf-2-sel-10.1177_17585732211032523.pdf]

Supplemental Information - 1: Search strategy (15/06/2020)

| Database – PubMed results |                                                                                                                                                                                                                                                                                                                                                                                                                                                                                                                                                                                                                                                                                                                                                                                                                                                                                                                                                                                                                                                                                                                                                                                                                                                                                                                                                                                                                                     |         |
|---------------------------|-------------------------------------------------------------------------------------------------------------------------------------------------------------------------------------------------------------------------------------------------------------------------------------------------------------------------------------------------------------------------------------------------------------------------------------------------------------------------------------------------------------------------------------------------------------------------------------------------------------------------------------------------------------------------------------------------------------------------------------------------------------------------------------------------------------------------------------------------------------------------------------------------------------------------------------------------------------------------------------------------------------------------------------------------------------------------------------------------------------------------------------------------------------------------------------------------------------------------------------------------------------------------------------------------------------------------------------------------------------------------------------------------------------------------------------|---------|
| Search                    | Query                                                                                                                                                                                                                                                                                                                                                                                                                                                                                                                                                                                                                                                                                                                                                                                                                                                                                                                                                                                                                                                                                                                                                                                                                                                                                                                                                                                                                               | Results |
| 1                         | <p>(((Shoulder AND ((surgery) OR (arthroscopy) OR (arthroplasty))) AND ((skin preparation) OR (home treatment) OR (decolonisation))) AND ((<i>cutibacterium</i>) OR (<i>propionibacterium</i>))))</p> <p>(((("shoulder"[MeSH Terms] OR "shoulder"[All Fields]) OR "shoulders"[All Fields] OR "shoulder s"[All Fields]) AND (((((((("surgery"[MeSH Subheading] OR "surgery"[All Fields]) OR "surgical procedures, operative"[MeSH Terms]) OR ("surgical"[All Fields] AND "procedures"[All Fields]) AND "operative"[All Fields])) OR "operative surgical procedures"[All Fields] OR "general surgery"[MeSH Terms] OR ("general"[All Fields] AND "surgery"[All Fields])) OR "general surgery"[All Fields] OR "surgery s"[All Fields] OR "surgeries"[All Fields] OR "surgeries"[All Fields] OR ("arthroscopy"[MeSH Terms] OR "arthroscopy"[All Fields] OR "arthroscopies"[All Fields]) OR ("arthroplasty"[MeSH Terms] OR "arthroplasty"[All Fields] OR "arthroplasties"[All Fields]))) AND (((("skin"[MeSH Terms] OR "skin"[All Fields]) AND (((((((("preparete"[All Fields] OR "preparates"[All Fields]) OR "preparation"[All Fields] OR "preparations"[All Fields] OR "preparative"[All Fields] OR "preparatively"[All Fields] OR "prepare"[All Fields] OR "prepared"[All Fields] OR "prepares"[All Fields] OR "preparing"[All Fields])) OR ("home"[All Fields] AND (((("therapeutics"[MeSH Terms] OR "therapeutics"[All Fields])</p> | 32      |

|                         |                                                                                                                                                                                                                                                                                                                                                                                                              |    |
|-------------------------|--------------------------------------------------------------------------------------------------------------------------------------------------------------------------------------------------------------------------------------------------------------------------------------------------------------------------------------------------------------------------------------------------------------|----|
|                         | OR "treatments"[All Fields]) OR "therapy"[MeSH Subheading])<br>OR "therapy"[All Fields]) OR "treatment"[All Fields]) OR<br>"treatment s"[All Fields])) OR (((("decolonisation"[All Fields]<br>OR "decolonise"[All Fields]) OR "decolonised"[All Fields]) OR<br>"decolonising"[All Fields])) AND ("cutibacterium"[All Fields]<br>OR ("propionibacterium"[MeSH Terms] OR<br>"propionibacterium"[All Fields])). |    |
| 2                       | (skin antisepsis) AND (( <i>cutibacterium</i> ) OR ( <i>propionibacterium</i> ))<br><br>(("skin"[MeSH Terms] OR "skin"[All Fields]) AND<br>("antisepsis"[MeSH Terms] OR "antisepsis"[All Fields])) AND<br>("cutibacterium"[All Fields] OR ("propionibacterium"[MeSH<br>Terms] OR "propionibacterium"[All Fields])).                                                                                          | 7  |
| <b>Cochrane Library</b> |                                                                                                                                                                                                                                                                                                                                                                                                              |    |
| 1                       | (((((Shoulder AND ((surgery) OR (arthroscopy) OR<br>(arthroplasty))) AND ((skin preparation) OR (home treatment)<br>OR (decolonisation))) AND ((cutibacterium) OR<br>(propionibacterium))))                                                                                                                                                                                                                  | 25 |
| 2                       | (skin antisepsis) AND (( <i>cutibacterium</i> ) OR ( <i>propionibacterium</i> ))                                                                                                                                                                                                                                                                                                                             | 6  |
| <b>EBSCOhost</b>        |                                                                                                                                                                                                                                                                                                                                                                                                              |    |
| 1                       | (((((Shoulder AND ((surgery) OR (arthroscopy) OR<br>(arthroplasty))) AND ((skin preparation) OR (home treatment)<br>OR (decolonisation))) AND ((cutibacterium) OR<br>(propionibacterium))))                                                                                                                                                                                                                  | 37 |
| 2                       | (skin antisepsis) AND (( <i>cutibacterium</i> ) OR ( <i>propionibacterium</i> ))                                                                                                                                                                                                                                                                                                                             | 3  |
