# Supplementary material
Source: PubMed Central journal article supplement (PMC9720868)
Supplement: sj-pdf-3-sel-10.1177_17585732211032523.pdf [file sj-pdf-3-sel-10.1177_17585732211032523.pdf]

Supplemental Information - 2: Methodological quality (CASP criteria)

| Randomised Control Trials |                                                |                                                          |                                                                                          |                                                                         |                                                    |                                                                            |                                           |                                                                         |
|---------------------------|------------------------------------------------|----------------------------------------------------------|------------------------------------------------------------------------------------------|-------------------------------------------------------------------------|----------------------------------------------------|----------------------------------------------------------------------------|-------------------------------------------|-------------------------------------------------------------------------|
| Study                     | Did the trial address a clearly focused issue? | Was the assignment of patients to treatments randomised? | Were all of the patients who entered the trial properly accounted for at its conclusion? | Were patients, health workers and study personnel 'blind' to treatment? | Were the groups similar at the start of the trial? | Aside from the experimental intervention, were the groups treated equally? | Is the primary outcome clearly specified? | Can the results be applied to the local population, or in your context? |
| Hancock et al. (2018)     | Yes                                            | Yes                                                      | Yes                                                                                      | No (not health care workers and patients)                               | Yes                                                | Yes                                                                        | Yes                                       | Yes                                                                     |
| Hsu et al. (2020)         | Yes                                            | Yes                                                      | Yes                                                                                      | No (not the patients)                                                   | Yes                                                | Yes                                                                        | Yes                                       | Yes                                                                     |
| Kolakowski et al. (2018)  | Yes                                            | Yes                                                      | Yes                                                                                      | Yes                                                                     | Yes                                                | Yes                                                                        | Yes                                       | Yes                                                                     |
| Sheer et al.              | Yes                                            | Yes                                                      | Yes                                                                                      | No (not the patients)                                                   | Yes                                                | Yes                                                                        | Yes                                       | Yes                                                                     |

|                        |     |     |     |                       |     |     |     |     |
|------------------------|-----|-----|-----|-----------------------|-----|-----|-----|-----|
| (2018)                 |     |     |     | )                     |     |     |     |     |
| Stull et al. (2020)    | Yes | Yes | Yes | No (not the surgeons) | Yes | Yes | Yes | Yes |
| Van Diek et al. (2020) | Yes | Yes | Yes | Yes                   | Yes | Yes | Yes | Yes |
| Yamakado (2017)        | Yes | Yes | Yes | No (not the surgeon)  | Yes | Yes | Yes | Yes |

| Cohort/case series studies |                                                |                                                |                                                                    |                                                                |                                                |                             |                                                     |                                                                 |
|----------------------------|------------------------------------------------|------------------------------------------------|--------------------------------------------------------------------|----------------------------------------------------------------|------------------------------------------------|-----------------------------|-----------------------------------------------------|-----------------------------------------------------------------|
| Study                      | Did the study address a clearly focused issue? | Was the cohort recruited in an acceptable way? | Was the exposure and outcome accurately measured to minimize bias? | Have the authors identified all important confounding factors? | Was the follow up of subjects complete enough? | Do you believe the results? | Can the results be applied to the local population? | Do the results of this study fit with other available evidence? |
| Blonna et al. (2018)       | Yes                                            | Yes                                            | Yes/Yes                                                            | Yes                                                            | Yes                                            | Yes                         | Yes                                                 | Yes                                                             |
| Dizay et al. (2017)        | Yes                                            | Yes                                            | Yes/No                                                             | No (didn't record compliance)                                  | Yes                                            | N/A                         | N/A                                                 | No                                                              |
| Duvall                     | Yes                                            | Yes                                            | Yes/Yes                                                            | Yes                                                            | N/A                                            | Yes                         | Yes                                                 | Yes                                                             |

|                          |     |     |         |                                  |     |     |     |     |
|--------------------------|-----|-----|---------|----------------------------------|-----|-----|-----|-----|
| et al.<br>(2019)         |     |     |         |                                  |     |     |     |     |
| Heckman et al.<br>(2018) | Yes | Yes | Yes/Yes | Yes                              | No  | Yes | Yes | Yes |
| Heckman et al.<br>(2019) | Yes | Yes | Yes/Yes | No<br>(didn't record compliance) | No  | Yes | Yes | Yes |
| Koh et al.<br>(2016)     | Yes | Yes | Yes/Yes | Yes                              | No  | Yes | Yes | Yes |
| MacLean et al.<br>(2018) | Yes | Yes | Yes/Yes | Yes                              | Yes | Yes | Yes | Yes |
| Matsen et al.<br>(2020)  | Yes | Yes | Yes/Yes | No<br>(didn't record compliance) | No  | Yes | Yes | Yes |
| Phadnis et al.<br>(2016) | Yes | Yes | Yes/Yes | Yes                              | N/A | Yes | Yes | Yes |
| Sabetta et al.<br>(2015) | Yes | Yes | Yes/Yes | Yes                              | N/A | Yes | Yes | Yes |

| <b>Prospective Case Control Studies</b> |                                                |                                           |                                             |                                                |                                                 |                                               |                                                       |                                                           |
|-----------------------------------------|------------------------------------------------|-------------------------------------------|---------------------------------------------|------------------------------------------------|-------------------------------------------------|-----------------------------------------------|-------------------------------------------------------|-----------------------------------------------------------|
| Study                                   | Did the study address a clearly focused issue? | Were the cases recruited in an acceptable | Were the controls selected in an acceptable | Aside from the experimental intervention, were | Have the authors taken account of the potential | How precise was the estimate of the treatment | Do the results of this study fit with other available | Can the results be applied to the local population, or in |

|                        |     | way? | way? | the groups treated equally? | confounding factors in the design and/or in their analysis? | effect? | evidence? Do you believe them? | your context? |
|------------------------|-----|------|------|-----------------------------|-------------------------------------------------------------|---------|--------------------------------|---------------|
| Chalmers et al. (2019) | Yes | Yes  | Yes  | Yes                         | Yes                                                         | Yes     | Yes/Yes                        | Yes           |
