# Supplementary material
Source: PubMed Central journal article supplement (PMC9720868)
Supplement: sj-pdf-4-sel-10.1177_17585732211032523.pdf [file sj-pdf-4-sel-10.1177_17585732211032523.pdf]

## Appendix 3 Results

### A. Home Treatment group

| Study                | Aim of the paper                                                                                                                                                                             | Type of study | Sample size                     | Type of procedure | Skin preparation                                                                                                                                                          | Sampling method            | Results reported as “most effective”                                                                                                                                                                         |
|----------------------|----------------------------------------------------------------------------------------------------------------------------------------------------------------------------------------------|---------------|---------------------------------|-------------------|---------------------------------------------------------------------------------------------------------------------------------------------------------------------------|----------------------------|--------------------------------------------------------------------------------------------------------------------------------------------------------------------------------------------------------------|
| Dizay et al (2017)   | Evaluation of effectiveness of 1.2%/5% C/BPO in decreasing <i>C. acnes</i> inoculation of shoulder. Determination of time-related effects of home treatment on <i>C. acnes</i> colonisation. | Cohort study  | 65 patients (43 male/22 female) | Arthroscopy       | C/BPO 1.2%/5% gel<br>Application once per day every day between pre-operative appointment and day of surgery (randomisation: 1-10 applications, average 2.3 applications) | Skin swabs<br>Tissue swabs | <b>C/BPO effective</b><br>Positive cultures in pre-surgical skin swab:<br>> 1 application of C/BPO=25.8%<br>= 1 application of C/BPO=33.3 %<br>Positive cultures in post-surgical tissue swab:<br>C/BPO=3.1% |
| Duvall et al. (2019) | Evaluation of the decrease in                                                                                                                                                                | Case series   | 34 healthy                      | No procedure      | 5% BPO gel<br>Application once                                                                                                                                            | Deep sebaceous             | <b>BPO effective in decreasing <i>C. acnes</i> but not permanently</b>                                                                                                                                       |

|                       |                                                                                                                                                                                  |              |                                          |              |                                                                                               |                              |                                                                                                                                                                                                                                                                                                                                                                                                                                             |
|-----------------------|----------------------------------------------------------------------------------------------------------------------------------------------------------------------------------|--------------|------------------------------------------|--------------|-----------------------------------------------------------------------------------------------|------------------------------|---------------------------------------------------------------------------------------------------------------------------------------------------------------------------------------------------------------------------------------------------------------------------------------------------------------------------------------------------------------------------------------------------------------------------------------------|
|                       | <i>C. acnes</i> load on the shoulder after application of 5% BPO, to determine whether the decrease in <i>C. acnes</i> load is transient, and to quantify the amount of rebound. |              | volunteers (23 male/11 female)           |              | per day for 3 days (total 3 applications)                                                     | glands samples               | Anterior: avg log reduction = -0.44<br>Avg log rebound = 0.69 (p=0.003)<br>Posterior: avg log reduction = -0.64<br>Avg log rebound=0.78 (p=0.008)<br>Lateral: avg log reduction = -0.64<br>Avg log rebound = 0.75 (p=0.003)<br>Axilla: avg log reduction=-0.40<br>Avg log rebound=0.31 (p=0.10)<br>Differences pre – treatment vs rebound CFU counts:<br>Anterior: (p=0.29)<br>Lateral: (p=0.33)<br>Posterior: (p=0.66)<br>Axilla: (p=0.69) |
| Heckman et al. (2019) | Comparison of effectiveness of 5% BPO monotherapy, 1 % clindamycin monotherapy and 5 %BPO+1 % clindamycin                                                                        | Cohort study | 12 healthy volunteers (10 male/2 female) | No procedure | 5 % BPO gel vs 1% clindamycin vs 5% BPO+1% clindamycin<br>Application twice per day for three | Dermal punch biopsy specimen | <b>None effective in eradicating <i>C. acnes</i> BPO in decreasing <i>C. acnes</i></b><br>Summary of positive culture results<br>NC= 33%<br>BPO=8.3%<br>CL=16.7%<br>C/BPO=16.7%<br>Positive biopsy cultures results:                                                                                                                                                                                                                        |

|                          |                                                                                                                                                          |     |                                 |                                           |                                                                                                                 |                                         |                                                                                                                                                                                                                                                                                             |
|--------------------------|----------------------------------------------------------------------------------------------------------------------------------------------------------|-----|---------------------------------|-------------------------------------------|-----------------------------------------------------------------------------------------------------------------|-----------------------------------------|---------------------------------------------------------------------------------------------------------------------------------------------------------------------------------------------------------------------------------------------------------------------------------------------|
|                          | combined therapy in eradicating <i>C. acnes</i> in the shoulder dermal layer skin                                                                        |     |                                 |                                           | days and with last application being the morning of specimen collection (total 6 applications).                 |                                         | NC vs BPO (p=0.0833)<br>NC vs C/BPO (p=0.1573)<br>NC vs CL (p=0.1573)                                                                                                                                                                                                                       |
| Hsu et al. (2020)        | Comparison of the effectiveness of home 4 % CGH washes with 10 % BPO soap in reducing <i>C. acnes</i> levels on the skin surface and incised wound edge. | RCT | 49 male patients                | Arthroplasty                              | 4 % CHG solution vs 10 % BPO soap<br>Application the night prior to and the morning of surgery (2 applications) | Skin surface swabs<br>Dermal edge swabs | <b>None</b><br>Skin swabs: SpCuV similar in both groups (CHG $1.6 \pm 1.1$ vs. BPO $1.5 \pm 1.4$ , p = 0.681) with 100 % positivity<br>Dermal edge swabs: similar in both groups (CHG $0.8 \pm 1.0$ vs. BPO $0.8 \pm 1.4$ , p = 0.991) and positive cultures CHG 61% vs BPO 46%, p = 0.369] |
| Kolakowski et al. (2018) | Evaluation of effect of 5% BPO gel compared with 4% CHG solution on the <i>C. acnes</i> skin burden.                                                     | RCT | 80 patients (37 male/43 female) | Arthroplasty (n=27)<br>Arthroscopy (n=53) | 5% BPO gel vs 4% CHG solution<br>Application of both solutions 3 mornings prior surgery (total 3                | Deep sebaceous glands samples           | <b>BPO</b><br>Decrease of positive cultures BPO treated site > BPO non-treated site (p=0.0003)<br>Decrease of positive cultures CHG treated site = CHG non treated site (p=0.80)<br>Decrease of positive cultures BPO (anterior)                                                            |

|                       |                                                                                                                                                            |              |                                 |              |                                                                                                                |                                                           |                                                                                                                                                                                                                                                          |
|-----------------------|------------------------------------------------------------------------------------------------------------------------------------------------------------|--------------|---------------------------------|--------------|----------------------------------------------------------------------------------------------------------------|-----------------------------------------------------------|----------------------------------------------------------------------------------------------------------------------------------------------------------------------------------------------------------------------------------------------------------|
|                       |                                                                                                                                                            |              |                                 |              | applications)                                                                                                  |                                                           | > CHG (anterior) (p= 0.027)<br>Decrease of positive cultures BPO (posterior) > CHG (posterior) (p= 0.005)<br>Decrease of positive cultures BPO (lateral) > CHG (lateral) (p=0.081)<br>Decrease of positive cultures BPO (axilla) = CHG (axilla) (p=0.99) |
| Matsen et al. (2020)  | Evaluation of effectiveness of 4% CHG solution as home treatment in eliminating <i>C. acnes</i> and other bacteria in patients undergoing shoulder surgery | Cohort study | 66 patients (44 male/22 female) | Arthroplasty | 4% CHG solution vs no comparison<br>Application the night before and morning of surgery (total 2 applications) | Skin surface swabs<br>Dermal edge swabs                   | <b>None</b><br>Average<br>SpCuV $1.0 \pm 0.9$ prior CHG application = $1.0 \pm 1.1$ post CHG application and prior surgery (p= 0.585)<br>Positive dermal cultures: 24 % patients (vs 3% +ve cultures for CoNS)                                           |
| Sabetta et al. (2015) | Evaluation of effectiveness of 5% BPO in reducing <i>C. acnes</i> in shoulder arthroscopic                                                                 | Case Series  | 50 patients (23 male/27 female) | Arthroscopy  | 5% BPO vs no comparison<br>Application twice per day 48 hrs prior trial day, totally 5 times                   | Skin swabs<br>Joint fluid aspirate<br>Deep tissue samples | <b>BPO</b><br>Pre-surgical skin preparation:<br>BPO treated anterior deltoid shoulder positive skin swabs= 16%<br>vs<br>Non- treated anterior deltoid shoulder                                                                                           |

|                     |                                                                                                                |     |                                           |              |                                                                                                                                                                                                                              |            |                                                                                                                                                                                                                                                                          |
|---------------------|----------------------------------------------------------------------------------------------------------------|-----|-------------------------------------------|--------------|------------------------------------------------------------------------------------------------------------------------------------------------------------------------------------------------------------------------------|------------|--------------------------------------------------------------------------------------------------------------------------------------------------------------------------------------------------------------------------------------------------------------------------|
|                     | patients                                                                                                       |     |                                           |              |                                                                                                                                                                                                                              |            | positive skin swabs= 32%<br>(p=0.001)<br>BPO treated axilla positive skin swabs= 8%<br>vs<br>Non-treated axilla positive skin swabs=28%<br>(p=0.013)<br>Post-surgical skin preparation:<br>Positive cultures samples=6.25%<br>Prior skin closure positive skin swabs=10% |
| Sheer et al. (2018) | Evaluation of effectiveness of 5% BPO gel in reduction of <i>C. acnes</i> compared with 4% CHG shower solution | RCT | 40 healthy volunteers (24 male/16 female) | No operation | 5% BPO gel vs 4% CHG solution<br>BPO: application twice per day 48 hrs prior trial day, totally 5 times<br>CHG: application the day prior trial twice with 2 sponges each, and once with 2 sponges the day of trial (total 3 | Skin swabs | <b>BPO</b><br>Positive cultures (post BPO application and surgical skin prep)<br>BPO=5%<br>CHG= 35% p=0.044                                                                                                                                                              |

|                        |                                                                                                                         |     |                                           |              |                                                                                                                         |            |                                                                          |
|------------------------|-------------------------------------------------------------------------------------------------------------------------|-----|-------------------------------------------|--------------|-------------------------------------------------------------------------------------------------------------------------|------------|--------------------------------------------------------------------------|
|                        |                                                                                                                         |     |                                           |              | applications)                                                                                                           |            |                                                                          |
| Van Diek et al. (2020) | Evaluation of effect of 5 % BPO gel application 5 times on the presence of <i>C. acnes</i> on the skin of the shoulder. | RCT | 30 healthy volunteers (11 male/19 female) | No operation | 5 % BPO gel vs placebo<br>Application during 2.5 days (3 times in the morning and 2 times in the evening) total 5 times | Skin swabs | <b>BPO</b><br>Positive cultures BPO = 20%<br>Placebo = 71.4 %<br>p=0.003 |

avg log= average logarithmic BPO=Benzoyl Peroxide; C/BPO-Clindamycin/Benzoyl Peroxide; CHG = Chlorhexidine Gluconate; CL= Clindamycin; CFU= Colony Forming Units; CoNs = Coagulase negative *Staphylococcus*; NC = negative control; RCT= Randomised Control Trial; SpCuV = Specimen Cutibacterium Value

## B. Surgical skin preparation

| Study                | Aim of the paper                                                                                                                                                                                                           | Type of study | Sample size                    | Type of procedure         | Skin preparation                                                                                                                                                                                                   | Sampling method | Results reported as “most effective”                                                                                                                                                                                                                                                                                         |
|----------------------|----------------------------------------------------------------------------------------------------------------------------------------------------------------------------------------------------------------------------|---------------|--------------------------------|---------------------------|--------------------------------------------------------------------------------------------------------------------------------------------------------------------------------------------------------------------|-----------------|------------------------------------------------------------------------------------------------------------------------------------------------------------------------------------------------------------------------------------------------------------------------------------------------------------------------------|
| Blonna et al. (2018) | Comparison of efficacy of single surgical skin preparation (1% iodine povidone/50% isopropyl alcohol) against double skin preparation (4% CHG followed by 1% iodine povidone/50% isopropyl alcohol) in patients undergoing | Cohort study  | 40 patients (8 male/32 female) | Proximal humeral fracture | Single surgical skin preparation vs double skin preparation (Single skin preparation=1% iodine povidone/50% isopropyl alcohol Double skin preparation=4% CHG followed by 1% iodine povidone/50% isopropyl alcohol) | Skin swabs      | <b>Single surgical skin preparation = double skin preparation</b><br>Positive cultures: Single surgical skin preparation=17.5% vs double skin preparation=17.5% (p=1)<br>Bacterial load <i>C. acnes</i> : Single surgical skin preparation CFU=9.61*10 <sup>2</sup> vs double skin preparation=1.61*10 <sup>2</sup> (p=0.07) |

|                        |                                                                                                                                                                                      |              |                                 |              |                                                                                                                                                                                    |                                           |                                                                                                                                                                                                                                                                                                                                                                                                                                     |
|------------------------|--------------------------------------------------------------------------------------------------------------------------------------------------------------------------------------|--------------|---------------------------------|--------------|------------------------------------------------------------------------------------------------------------------------------------------------------------------------------------|-------------------------------------------|-------------------------------------------------------------------------------------------------------------------------------------------------------------------------------------------------------------------------------------------------------------------------------------------------------------------------------------------------------------------------------------------------------------------------------------|
|                        | surgical treatment for proximal humeral fracture.                                                                                                                                    |              |                                 |              |                                                                                                                                                                                    |                                           |                                                                                                                                                                                                                                                                                                                                                                                                                                     |
| Chalmers et al. (2019) | Evaluation of effectiveness of 3% Hydrogen peroxide combined with standard surgical skin preparation in reducing positive culture rates in patient undergoing shoulder arthroplasty. | Case Control | 61 patients (29 male/32 female) | Arthroplasty | 3% H <sub>2</sub> O <sub>2</sub> + standard surgical skin preparation vs standard surgical skin preparation (Standard surgical skin preparation: 70% ethyl alcohol + 2 ChloroPrep) | Skin swabs<br>Dermis swabs<br>Joint swabs | <b>3% Hydrogen peroxide + standard surgical skin preparation</b><br>Total swabs positive <i>C. acnes</i> cultures:<br>Standard prep=27% (25/93) vs H <sub>2</sub> O <sub>2</sub> = 16% (14/90)<br>Total number of patients with 3 positive cultures:<br>Standard prep=19% vs H <sub>2</sub> O <sub>2</sub> group=0% (p=0.024)<br>Joint positive cultures:<br>Standard prep=35% vs H <sub>2</sub> O <sub>2</sub> group=10% (p=0.031) |
| Hancock et al. (2018)  | Evaluation of effectiveness of 5% BPO combined with standard surgical skin preparation in reduction of <i>C.</i>                                                                     | RCT          | 22 male healthy volunteers      | No procedure | 5% BPO + standard surgical skin preparation vs standard surgical skin preparation (Standard surgical                                                                               | Skin swabs                                | <b>None</b><br>Total number of participants with positive cultures: 5%BPO + standard prep: n=9 (20%) vs standard prep: n=6 (14%) p=0.57<br>Number of participants with positive cultures on the anterior deltoid:<br>BPO + standard prep: n=5 (22%) vs                                                                                                                                                                              |



|                       |                                                                                                                                        |              |                            |              |                                                                                                                                                                                                        |                         |                                                                                                                                                                                                                                                                                                                                                      |
|-----------------------|----------------------------------------------------------------------------------------------------------------------------------------|--------------|----------------------------|--------------|--------------------------------------------------------------------------------------------------------------------------------------------------------------------------------------------------------|-------------------------|------------------------------------------------------------------------------------------------------------------------------------------------------------------------------------------------------------------------------------------------------------------------------------------------------------------------------------------------------|
|                       | <i>acnes</i> on shoulder                                                                                                               |              |                            |              | skin preparation:<br>ChloraPrep)                                                                                                                                                                       |                         | standard prep: n=4 (18%) p=0.66<br>Number of participants with positive cultures on the anterior axilla:<br>BPO + standard prep: n=4 (18%) vs<br>standard prep: n= 2 (9%) p= 0.64                                                                                                                                                                    |
| Heckman et al. (2018) | Evaluation of the effectiveness of various skin preparation methods in eradicating <i>C. acnes</i> in the dermal layer of the shoulder | Cohort study | 12 male healthy volunteers | No procedure | 70% isopropyl alcohol vs ChloraPrep (2% CHG and 70% isopropyl alcohol) vs 2% CHG and 70% isopropyl alcohol with a 2 minutes mechanical scrub using bristled surgical scrub vs 4% CHG and 70% isopropyl | Dermal biopsies samples | <b>Nil</b><br>Total positive cultures n=24:<br>70% isopropyl alcohol n=7 (58%)<br>vs<br>ChloraPrep n=5 (42%)<br>vs<br>2% CHG and 70% isopropyl alcohol with a 2 minutes mechanical scrub using bristled surgical scrub n=6 (50%)<br>vs<br>4% CHG and 70% isopropyl alcohol with a 2 minutes mechanical scrub using bristled surgical scrub n=6 (50%) |

|                         |                                                                                                                                                                   |                 |                                 |                       |                                                                                                                                   |              |                                                                                                                                                                                                                                             |
|-------------------------|-------------------------------------------------------------------------------------------------------------------------------------------------------------------|-----------------|---------------------------------|-----------------------|-----------------------------------------------------------------------------------------------------------------------------------|--------------|---------------------------------------------------------------------------------------------------------------------------------------------------------------------------------------------------------------------------------------------|
|                         |                                                                                                                                                                   |                 |                                 |                       | alcohol with a 2 minutes mechanical scrub using bristled surgical scrub                                                           |              |                                                                                                                                                                                                                                             |
| Hernandez et al. (2019) | <i>In vitro</i> evaluation of effectiveness of H <sub>2</sub> O <sub>2</sub> as surgical skin preparation (various concentrations) in eradicating <i>C. acnes</i> | <i>In vitro</i> | N/a                             | N/a                   | 0%, 1%, 3%, 4%, 6%, 8%, 10% H <sub>2</sub> O <sub>2</sub> in saline or water vs 3% topical H <sub>2</sub> O <sub>2</sub> solution | N/a          | <b>3% H<sub>2</sub>O<sub>2</sub> solution applied for 5 minutes</b><br>3% H <sub>2</sub> O <sub>2</sub> for 5 min vs water-only control: p<0.0001<br>3% H <sub>2</sub> O <sub>2</sub> vs 3% hydrogen peroxide in water or saline: p< 0.0001 |
| McLean et al. (2018)    | Evaluation of effectiveness of 0.1% aqueous chlorhexidine in reduction of <i>C. acnes</i> in patients undergoing open surgery                                     | Cohort study    | 50 patients (22 male/28 female) | Open shoulder surgery | 0.1% aqueous chlorhexidine                                                                                                        | Dermal swabs | <b>None</b><br>Total positive <i>C. acnes</i> cultures 38/150 (25%)<br>Pre-prep: n=9<br>5 min post: n=11<br>60 min post: n= 18<br>Pre-prep vs 60 min post: p=0.043<br>5 min post vs 60 min post: p=0.123<br>Pre-prep vs 5 min post: p=0.617 |

|                       |                                                                                                                                                                                                  |             |                                 |                       |                                                                                                                                                                |                                                      |                                                                                                                                                                                               |
|-----------------------|--------------------------------------------------------------------------------------------------------------------------------------------------------------------------------------------------|-------------|---------------------------------|-----------------------|----------------------------------------------------------------------------------------------------------------------------------------------------------------|------------------------------------------------------|-----------------------------------------------------------------------------------------------------------------------------------------------------------------------------------------------|
| Phadnis et al. (2016) | Evaluation of effectiveness of ChloroPrep (combined with standard preoperative antibiotic prophylaxis) in reducing <i>C. acnes</i> in dermal layer in patients undergoing open shoulder surgery. | Case series | 50 patients (30 male/20 female) | Open shoulder surgery | ChloroPrep                                                                                                                                                     | Skin swabs<br>Dermal swabs<br>Dermal biopsy specimen | <b>None</b><br>Positive samples pre – prep vs post – prep vs dermal swabs vs dermal biopsy: pre-prep n=21 (42%) vs post-prep n=7 (33%) vs dermal swabs n=26 (52%) vs dermal biopsy n=20 (40%) |
| Stull et al. (2020)   | Evaluation of effectiveness of 3% H <sub>2</sub> O <sub>2</sub> combined with standard surgical skin preparation in reducing positive culture rates in patient undergoing                        | RCT         | 140 male patients               | Arthroscopy           | 3% H <sub>2</sub> O <sub>2</sub> + standard surgical skin preparation vs standard surgical skin preparation (Standard surgical skin preparation: 2% CHG + 7.5% | Punch biopsy samples                                 | <b>3% Hydrogen peroxide + standard surgical skin preparation</b><br>Positive cultures: H <sub>2</sub> O <sub>2</sub> group=17.1% vs control group=34.2% (p=0.033)                             |

|                 |                                                                                                                                                                                                                                                                 |     |                                     |             |                                                                                                                                          |            |                                                                                                                                                                                                                                                                                         |
|-----------------|-----------------------------------------------------------------------------------------------------------------------------------------------------------------------------------------------------------------------------------------------------------------|-----|-------------------------------------|-------------|------------------------------------------------------------------------------------------------------------------------------------------|------------|-----------------------------------------------------------------------------------------------------------------------------------------------------------------------------------------------------------------------------------------------------------------------------------------|
|                 | shoulder arthroscopy.                                                                                                                                                                                                                                           |     |                                     |             | povidone-iodine solution + 2 ChloraPrep                                                                                                  |            |                                                                                                                                                                                                                                                                                         |
| Yamakado (2017) | Evaluation of effectiveness of 1% CHG and 70% alcohol with drape against 1% CHG and 70% alcohol without drape and against povidone iodine with and without drape in reducing <i>C. acnes</i> contamination rate of the anchor sutures in arthroscopic procedure | RCT | 126 patients (88 men and 38 women ) | Arthroscopy | 1% CHG and 70% alcohol with drape vs 1% CHG and 70% alcohol without drape vs povidone iodine with drape vs povidone iodine without drape | Skin swabs | <b>1% CHG and 70% alcohol with drape</b><br><br>Positive <i>C. acnes</i> cultures:<br>1% CHG and 70% alcohol with drape n=3/32 (9.3%) vs 1% CHG and 70% alcohol without drape n= 10/30 (33%) vs povidone iodine with drape n=11/33 (33%) vs povidone iodine without drape n=14/31 (47%) |

CFU= Colony Forming Units; CHG = chlorhexidine gluconate; ChloraPrep= 2% chlorhexidine gluconate + 70% isopropyl alcohol; H<sub>2</sub>O<sub>2</sub>=Hydrogen Peroxide

C. Aseptic protocol

| Study             | Aim of the paper                                                                                                                                                                                       | Type of study | Sample size                    | Type of procedure | Skin preparation                                                                                                                                                                                                                  | Sampling method            | Results reported as “most effective”                                                                                                                                                                           |
|-------------------|--------------------------------------------------------------------------------------------------------------------------------------------------------------------------------------------------------|---------------|--------------------------------|-------------------|-----------------------------------------------------------------------------------------------------------------------------------------------------------------------------------------------------------------------------------|----------------------------|----------------------------------------------------------------------------------------------------------------------------------------------------------------------------------------------------------------|
| Koh et al. (2016) | Evaluation of efficacy of aseptic protocol comprised by home treatment with 4 % chlorhexidine – impregnated scrub, which patients used to shower 24 hours prior surgery, and surgical skin preparation | Cohort study  | 30 patients (7 male/23 female) | Arthroplasty      | Home treatment + Surgical skin preparation. (Home treatment: 4 % chlorhexidine – impregnated scrub – shower 24 hrs. prior surgery. Surgical skin preparation: 4 % chlorhexidine – impregnated scrub followed by 2 applications of | Skin swabs<br>Dermal swabs | <b>None</b><br><br>Total number of patients with positive <i>C. acnes</i> cultures: n=22 (73%)<br><br>S1=47% vs S2 = 40% (p=0.13) vs S3=27% (p=0.76) vs D4=43% (p=0.19) vs D5=37% (p=0.53) vs S6= 43% (p=0.53) |

|  |                                                                                                                                                                                        |  |  |  |            |  |  |
|--|----------------------------------------------------------------------------------------------------------------------------------------------------------------------------------------|--|--|--|------------|--|--|
|  | <p>which was comprised by 4 % chlorhexidine – impregnated scrub followed by 2 applications of ChloroPrep in reducing <i>C. acnes</i> in patients undergoing shoulder arthroplasty.</p> |  |  |  | ChloroPrep |  |  |
|--|----------------------------------------------------------------------------------------------------------------------------------------------------------------------------------------|--|--|--|------------|--|--|

ChloroPrep = 2% chlorhexidine gluconate and 70% isopropyl alcohol; S=skin swab; D= dermal swab
